# Supplementary material
Source: PubMed Central journal article supplement (PMC5453714)

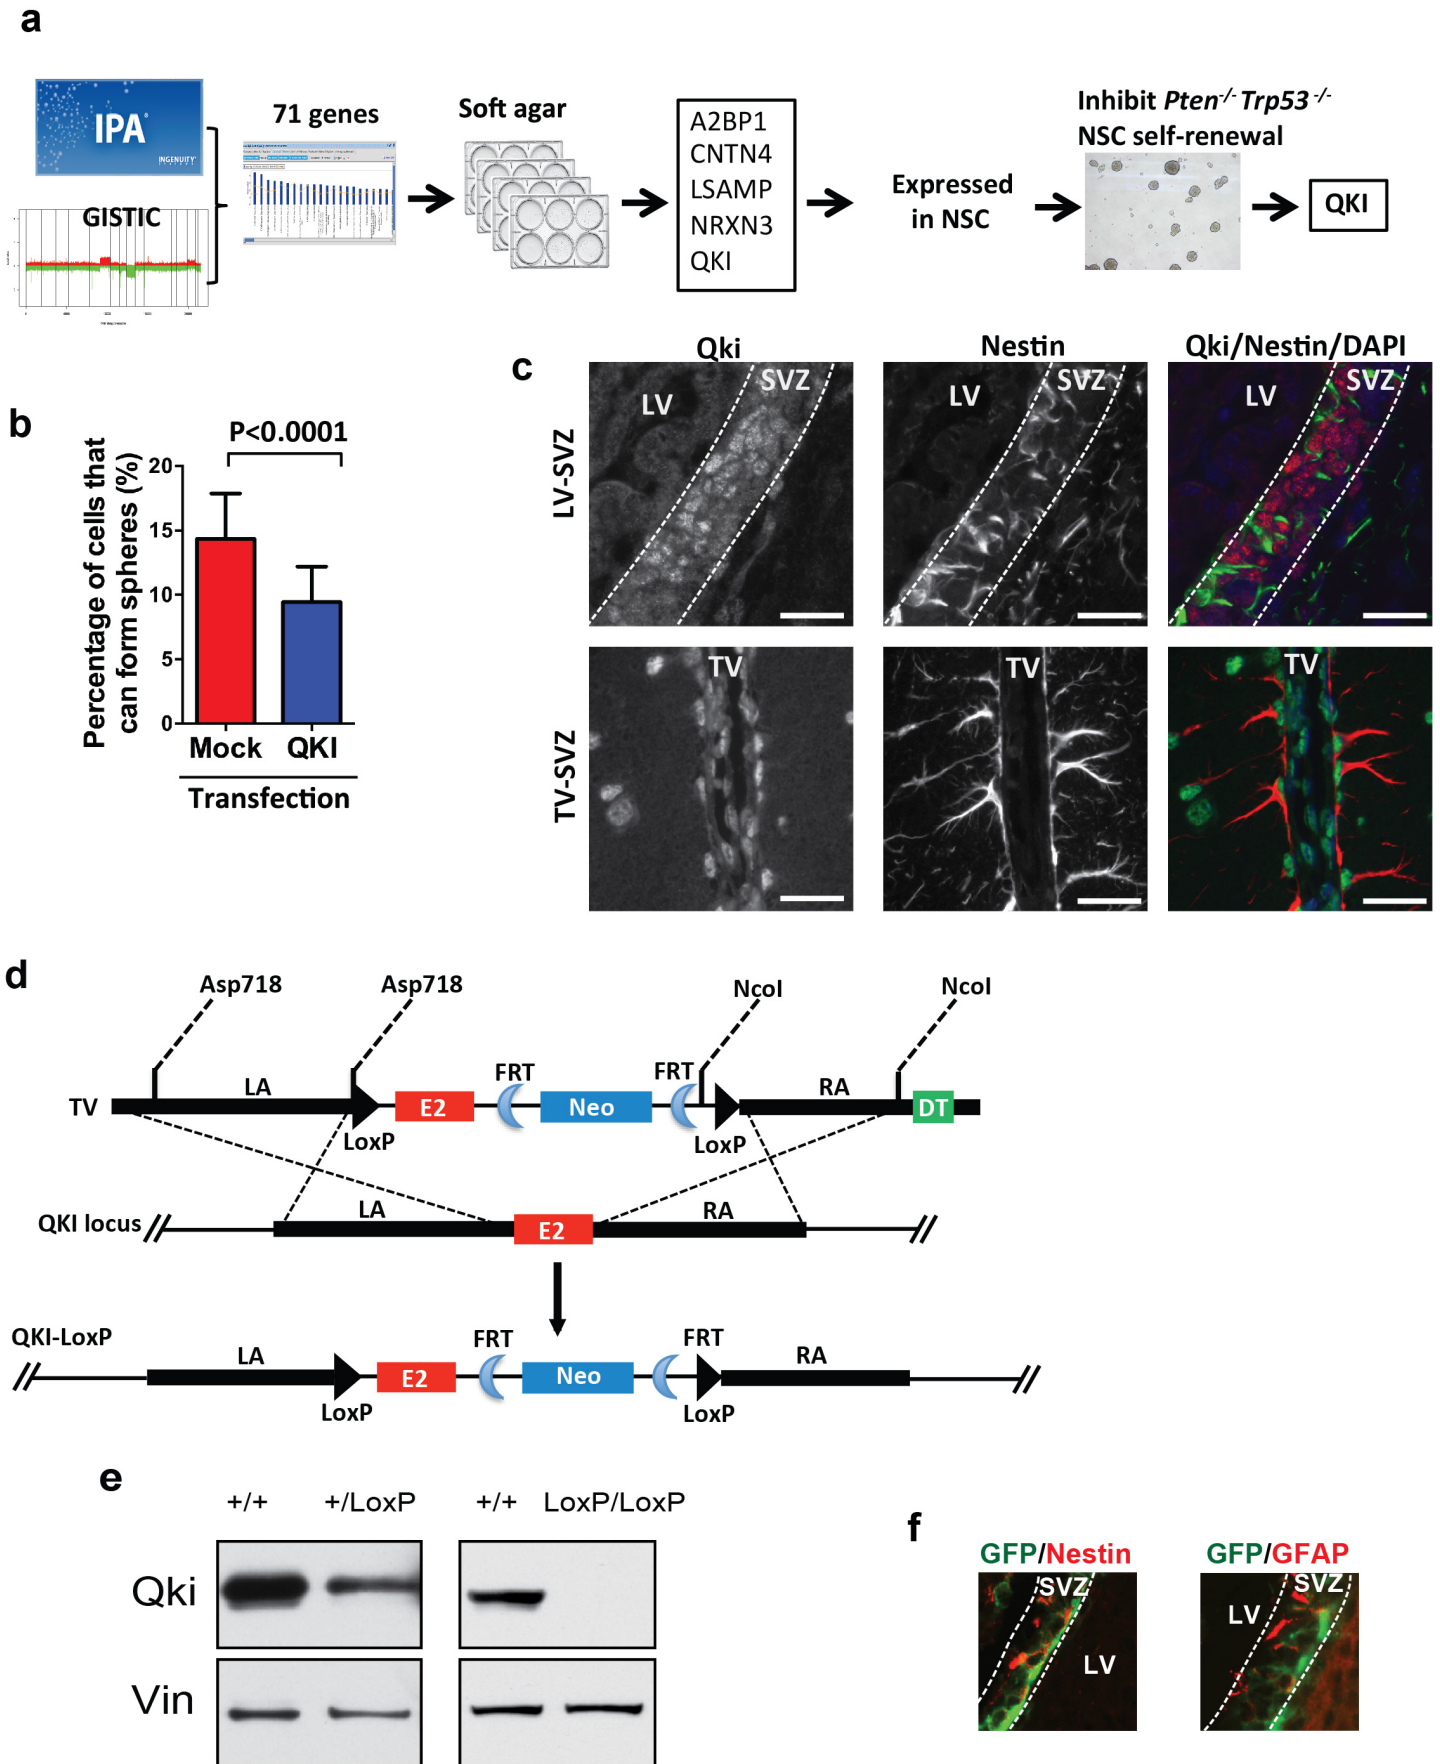

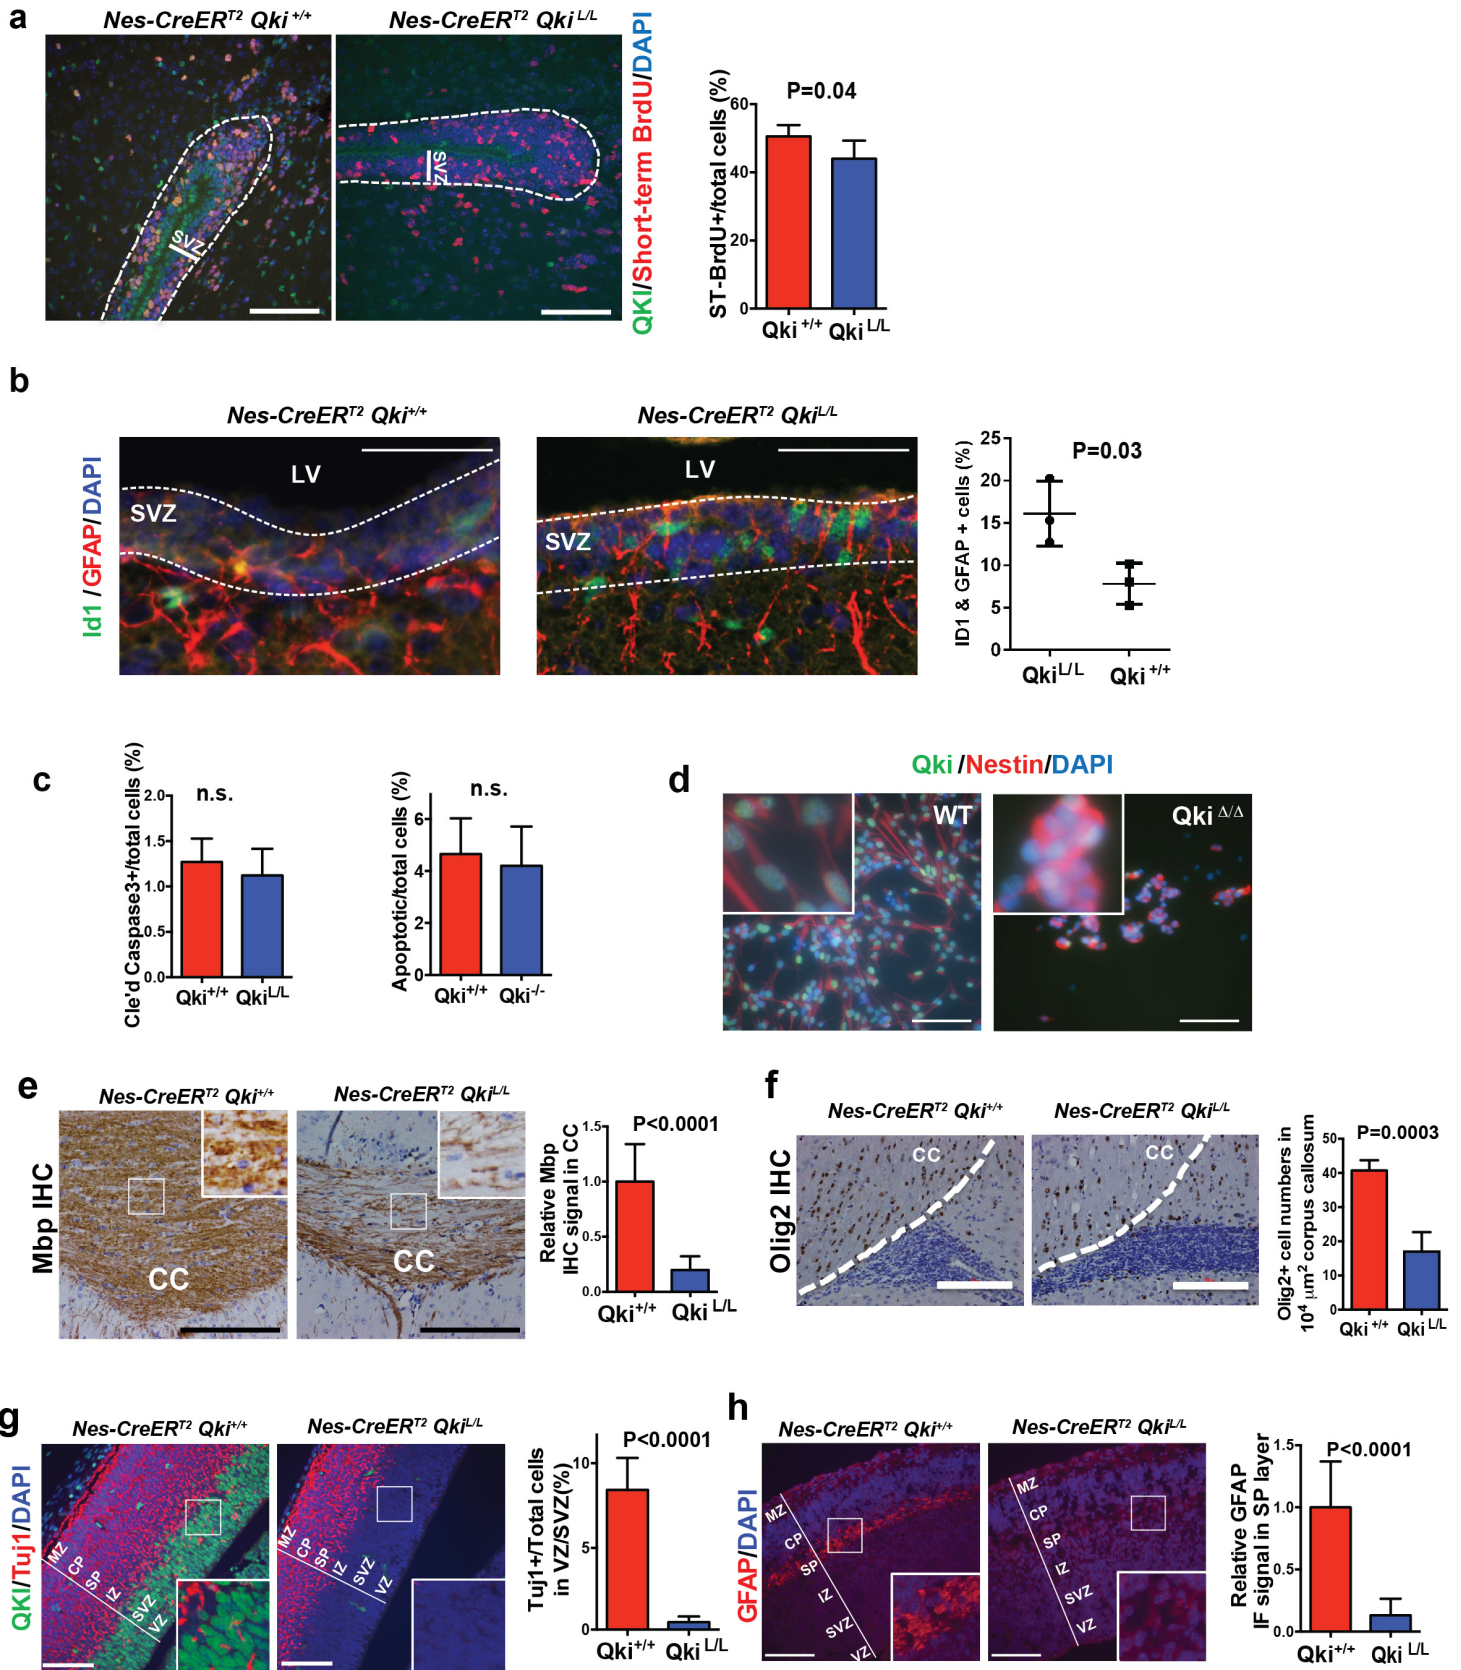

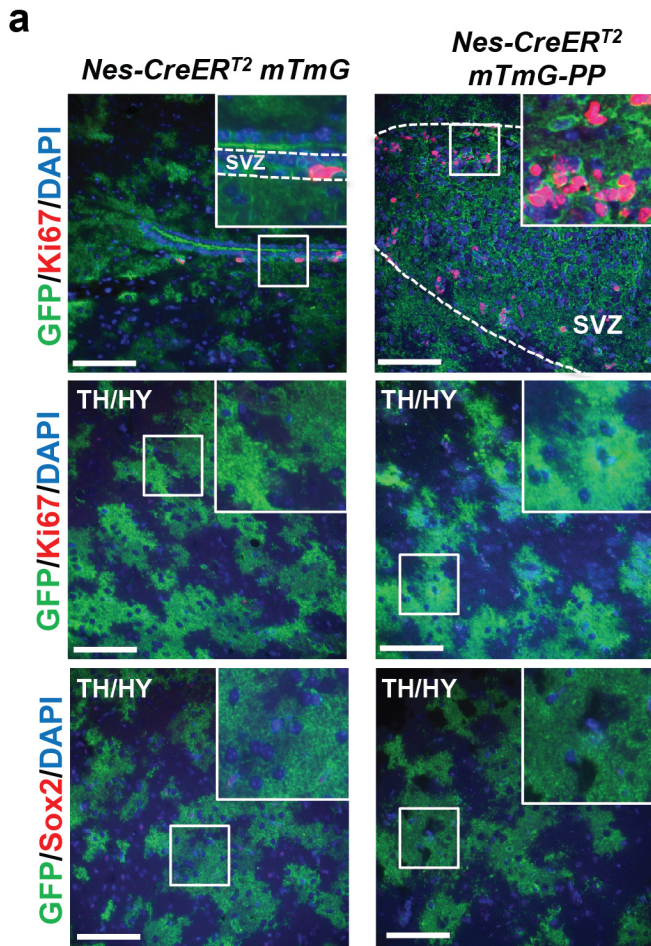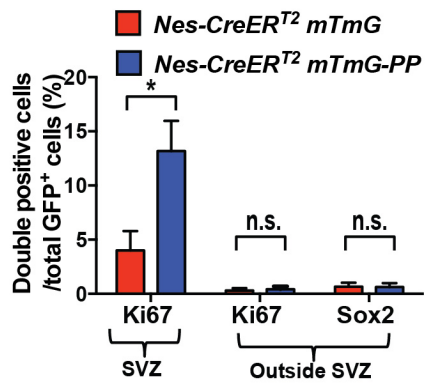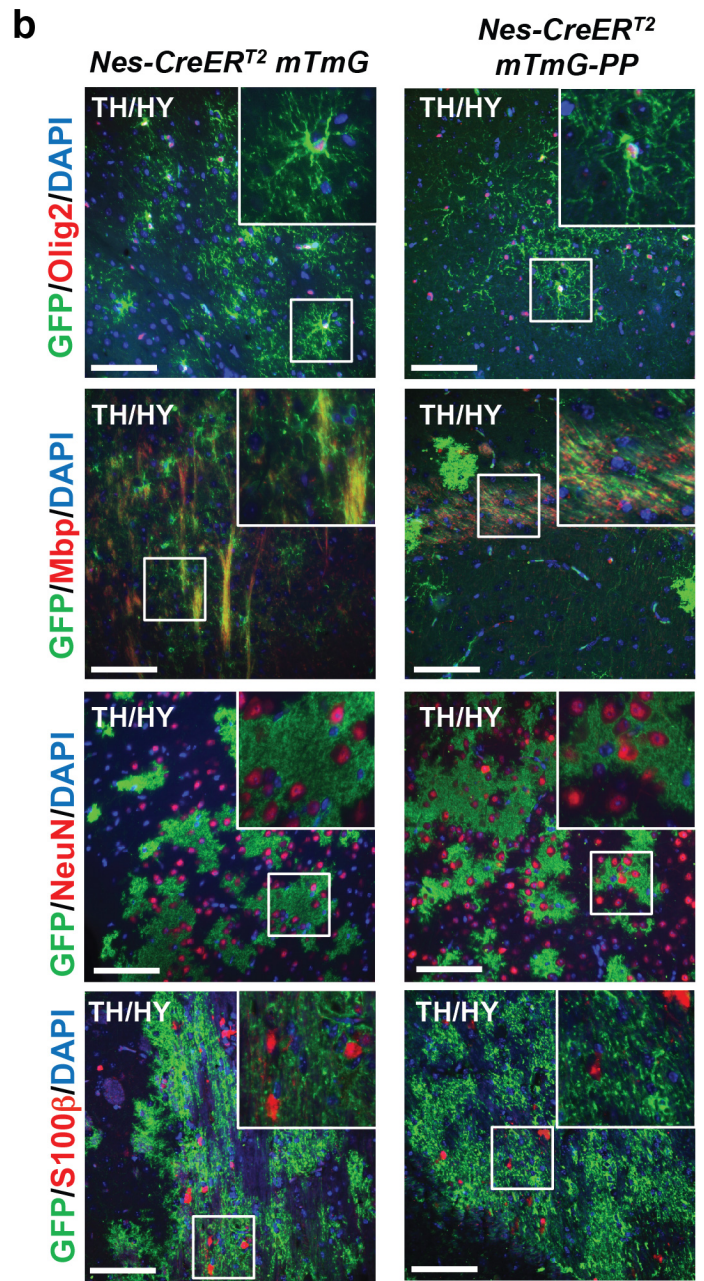

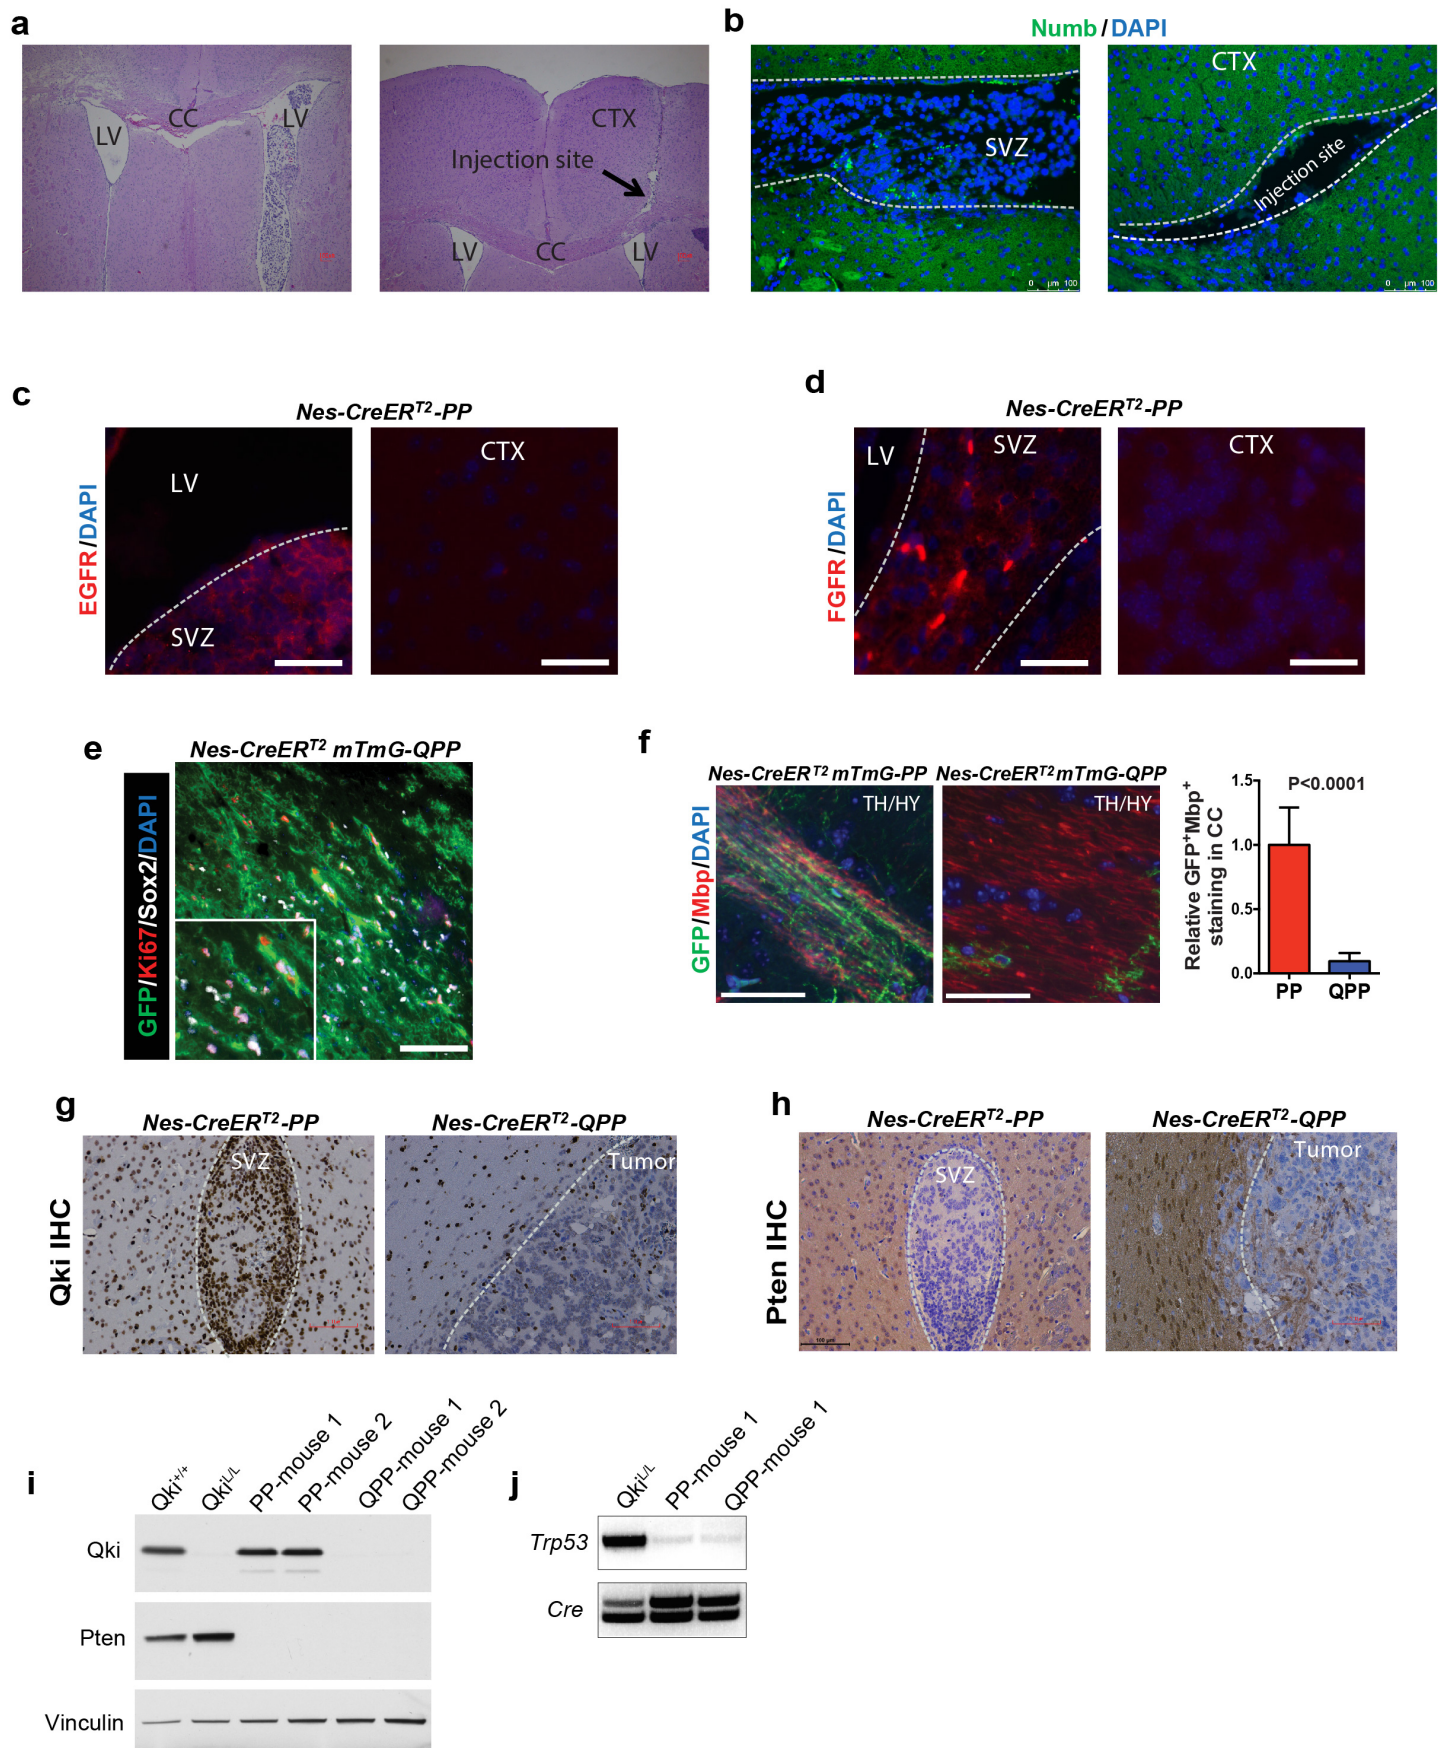

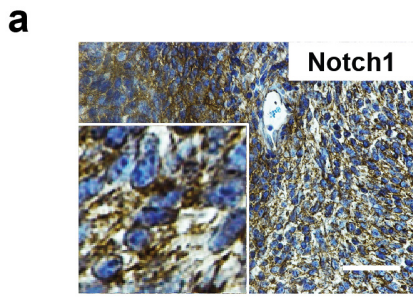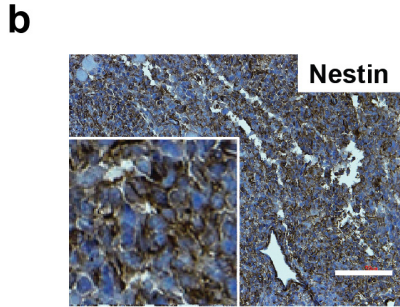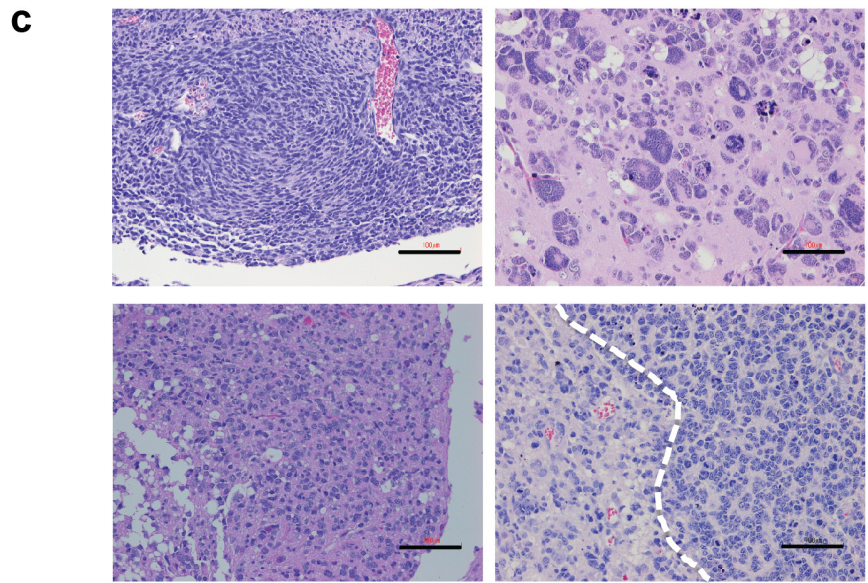

- d**
- $Nes-CreER^{T2} Qki^{L/L}$  ( $n=20$ )
  - $Nes-CreER^{T2} Pten^{L/L} Trp53^{L/L}$  ( $n=12$ )
  - $Nes-CreER^{T2} Qki^{L/L} Pten^{L/L} Trp53^{L/L}$  ( $n=15$ )

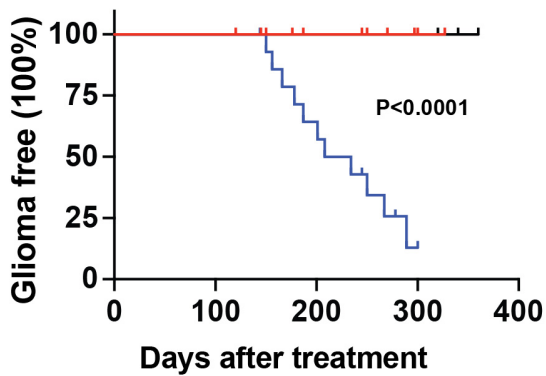

- e**
- $Nes-CreER^{T2} Pten^{L/L} Ink4a/Arf^{L/L}$  ( $n=15$ )
  - $Nes-CreER^{T2} Qki^{L/L} Pten^{L/L} Ink4a/Arf^{L/L}$  ( $n=17$ )

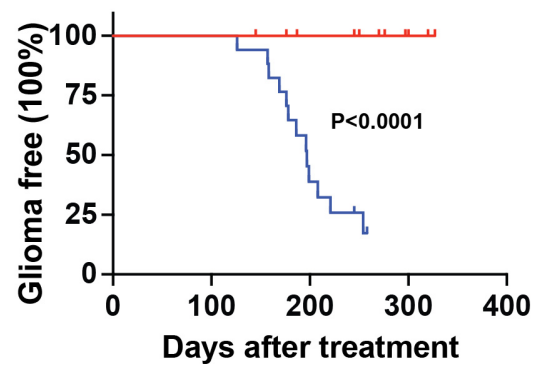

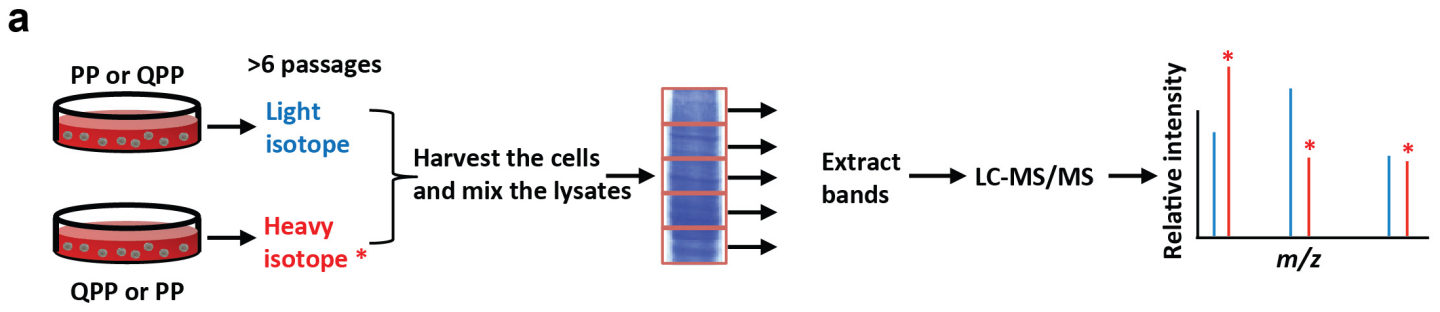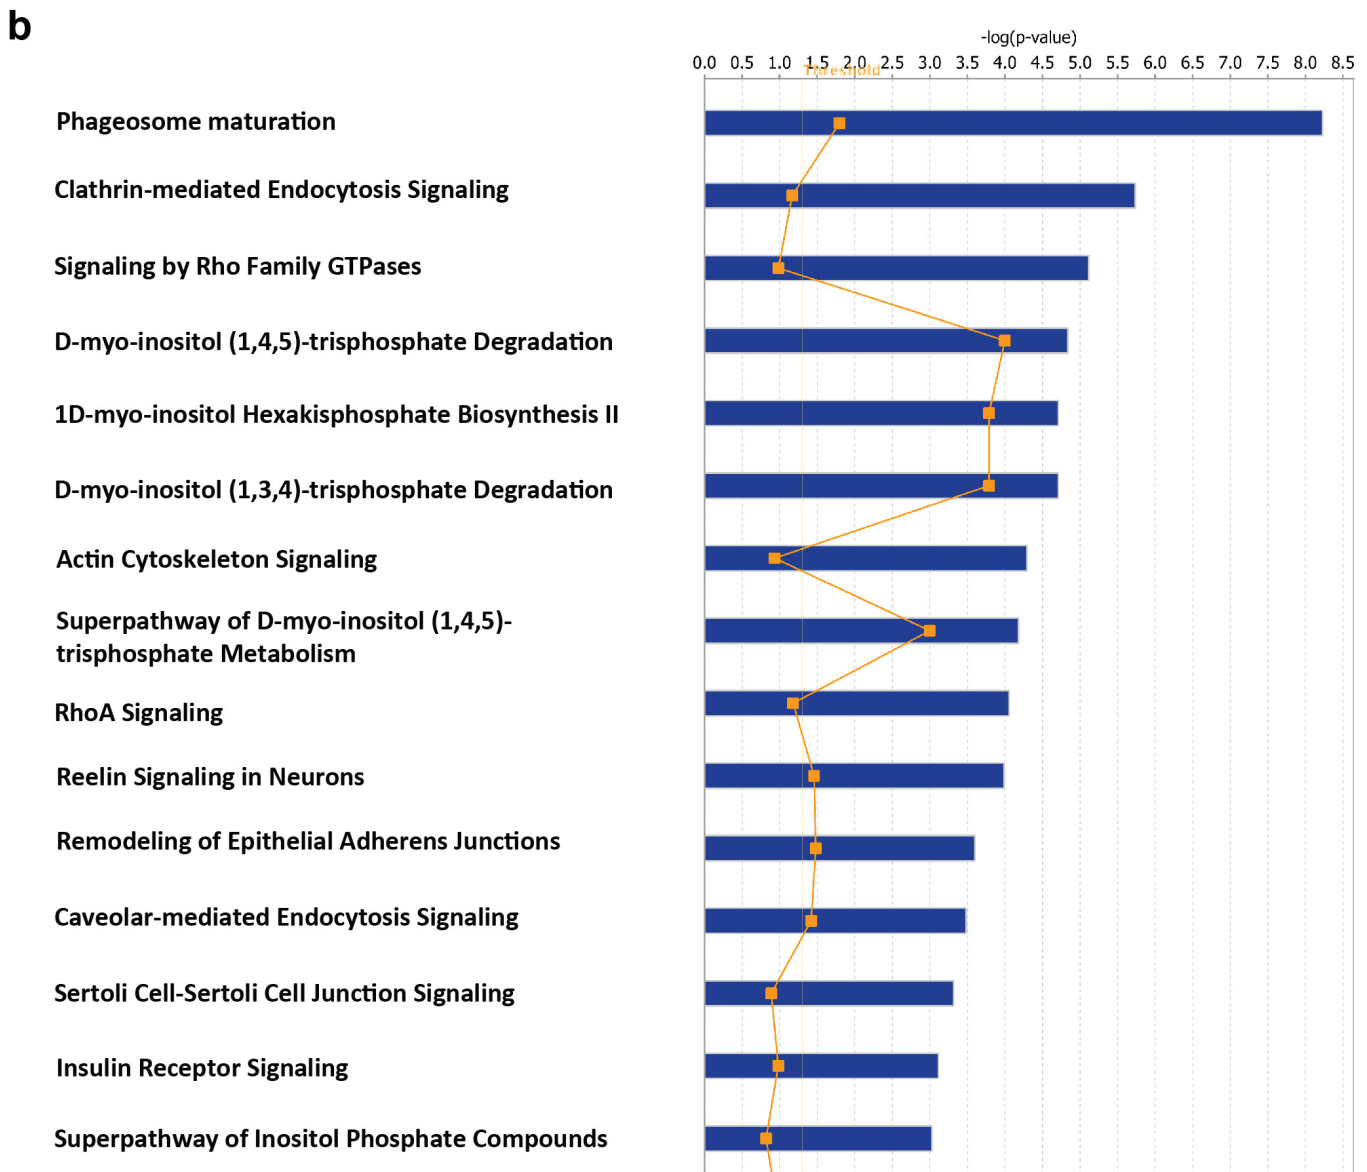

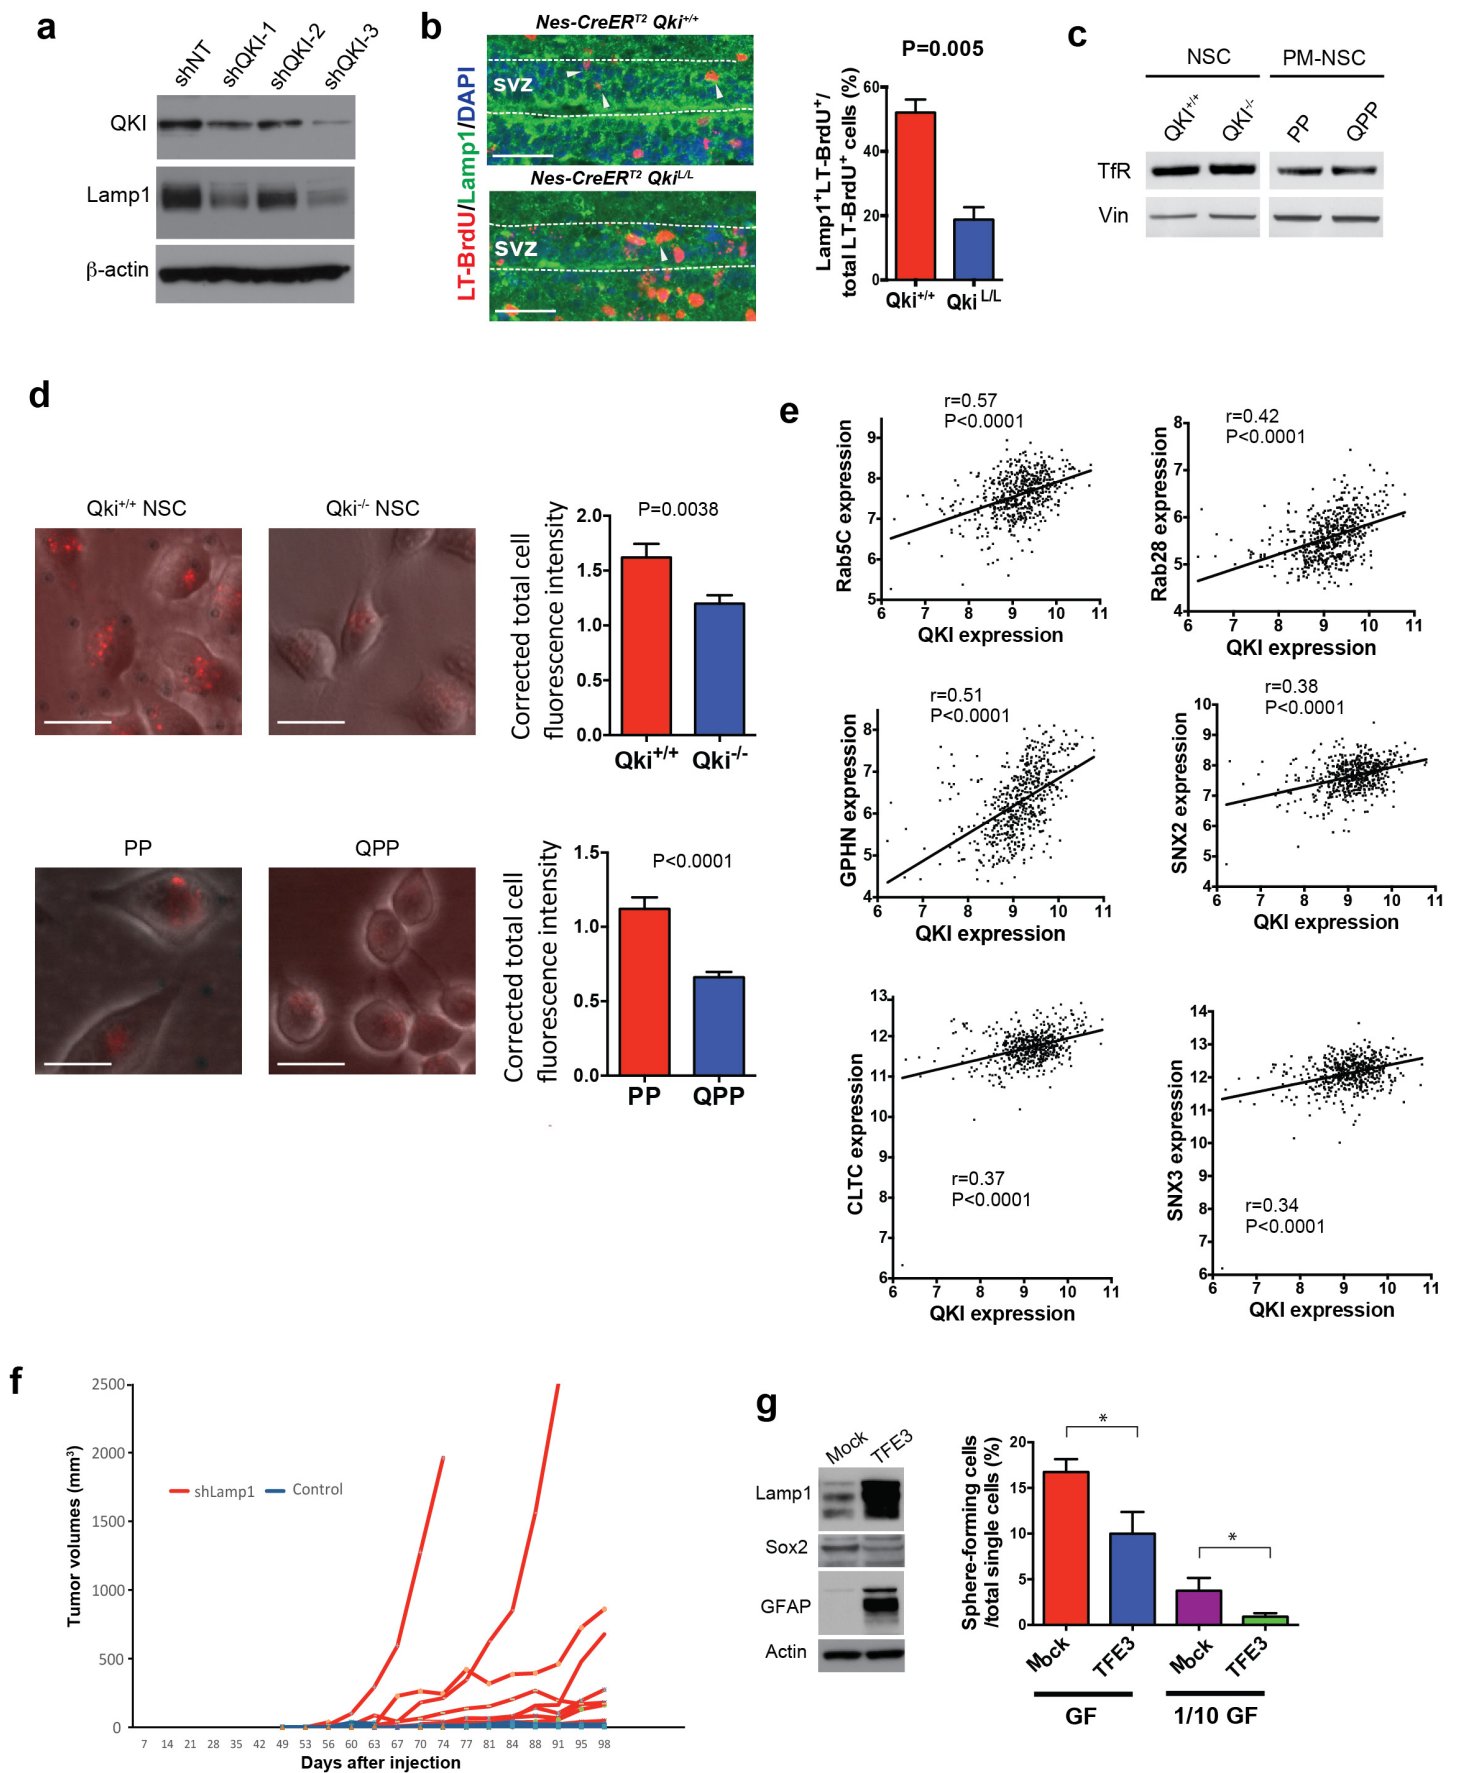

Shingu et al Supplementary Figure 7

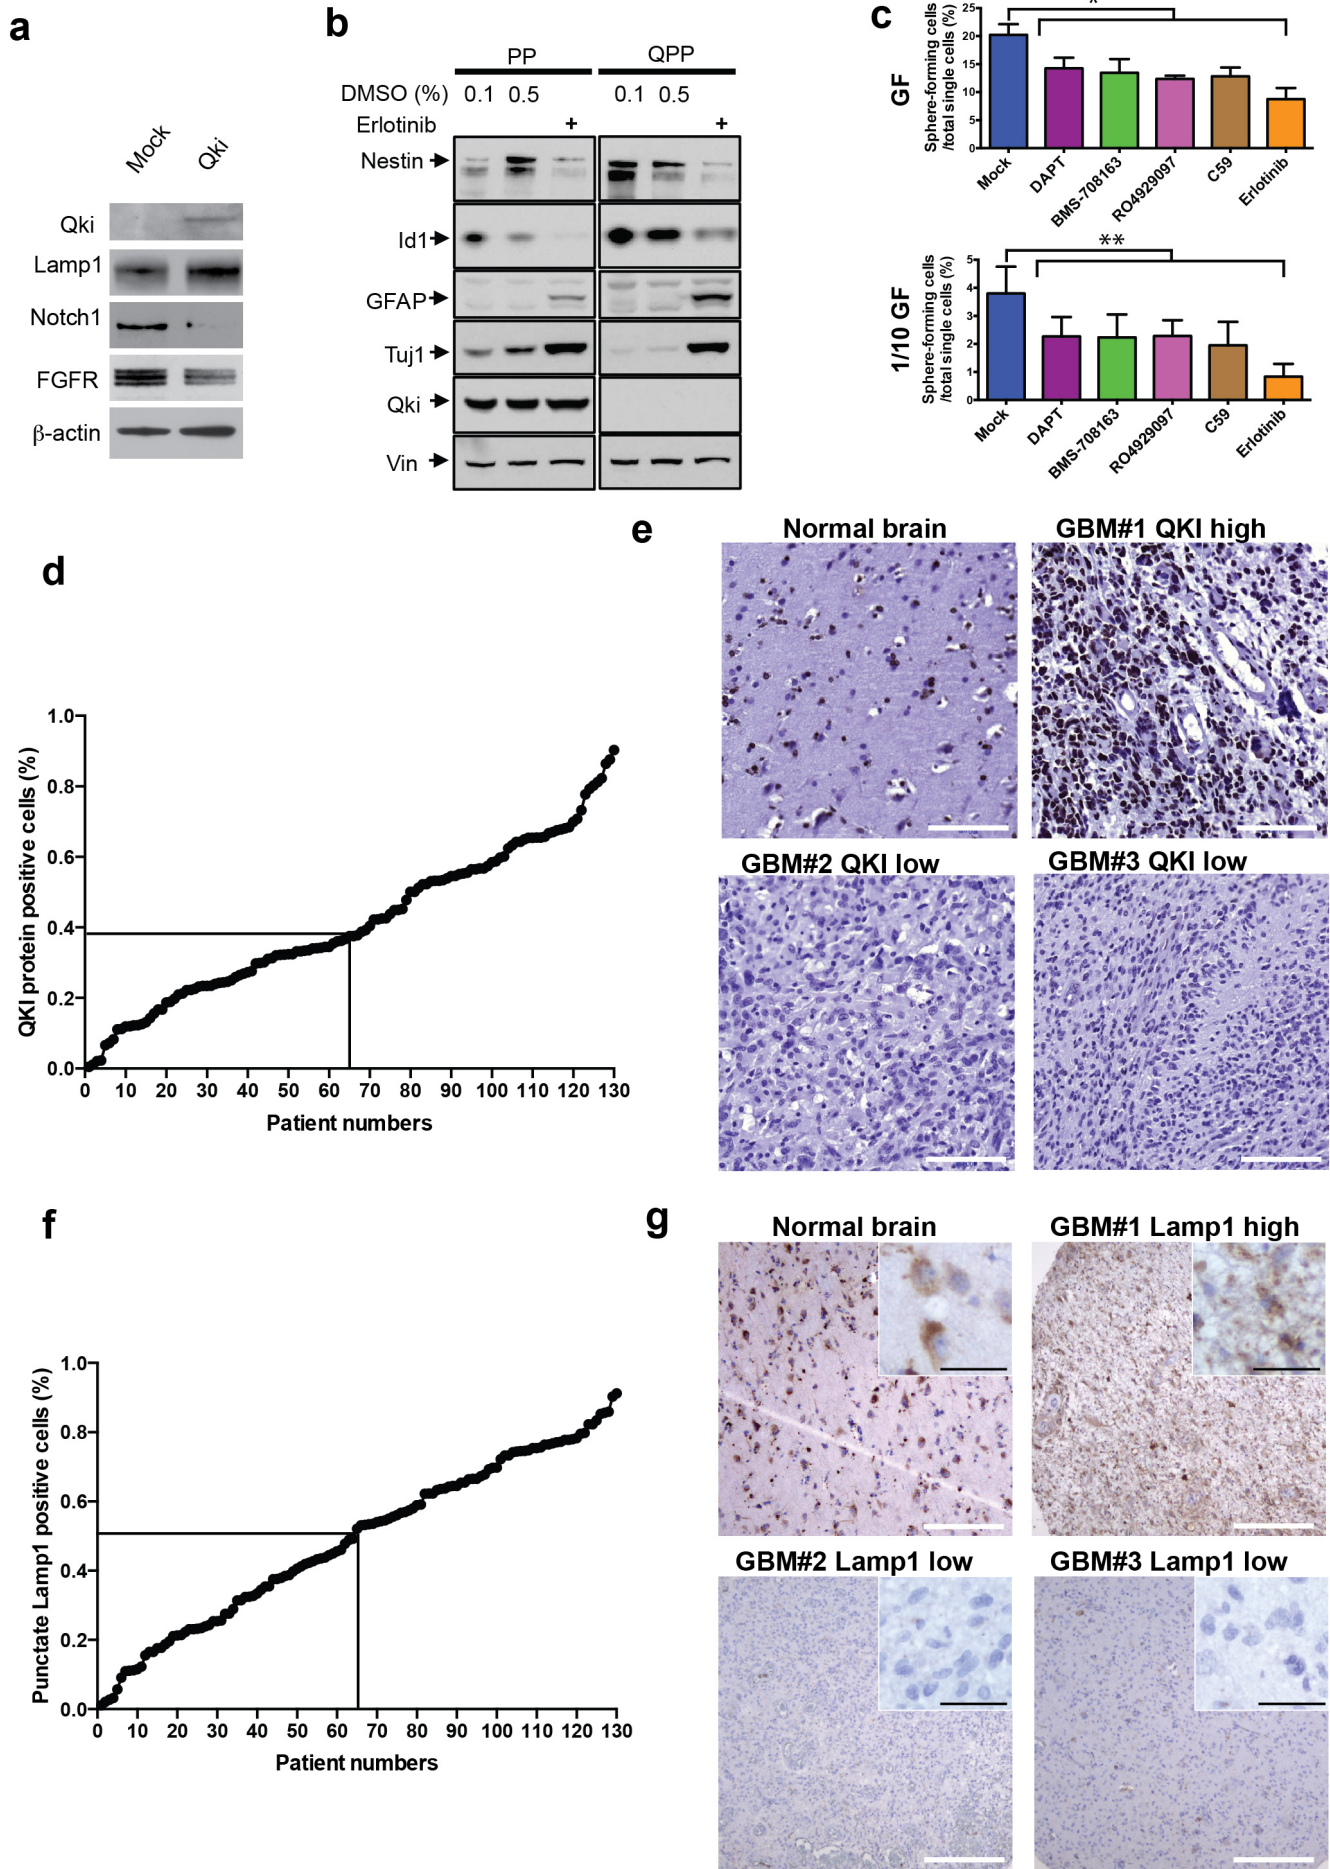

Supplement: NIHMS836917-supplement-Supp_Figures.pdf [file NIHMS836917-supplement-Supp_Figures.pdf]
